# Supplementary material for: Development process of a mobile electronic medical record for nurses: a single case study
Source: Springer Nature journal article supplement (doi:10.1186/s12911-018-0726-3), 2019-01-14
Supplement: MOESM2 [file 16396396]

## Functionality MEMR

### Measurements

1. Heart Rate
2. Blood pressure
3. Temperature
4. Respiratory rate
5. Oxygen saturation
6. Oxygen intake
7. Urine production
8. Defecation
9. Weight
10. Length
11. Thorax drain fluid
12. Thorax drain air leak

} version 1

} version 2

### Scores

1. Early Warning Score
2. Pain Score
