# Supplementary material for: Development process of a mobile electronic medical record for nurses: a single case study
Source: BMC Med Inform Decis Mak. 2019 Jan 14;19:11. doi: 10.1186/s12911-018-0726-3 (PMC6332569; doi:10.1186/s12911-018-0726-3)
Supplement: Supplementary file 1 — Table S1. List of interviewed subjects and methods. (XLSX 10 kb) [file 12911_2018_726_MOESM1_ESM.xlsx]

## Sheet: Sheet1
Function	Unit	Sort	Structure	Notes
senior staff member	department A	interview	open-ended with timeline	recorded and transcribed
ICT manager	department A	interview	open with timeline	recorded and transcribed
policy advisor	department B	short inquiry	n.a.	notes in tablet
project manager MEMR	IT department	interviews (2)	open-ended	notes in tablet
			semi-structured with timeline	recorded and transcribed
senior nurse	NU1	short inquiry	n.a.	notes afterwards in tablet
senior nurse	NU1	short interview during work time	open-ended	hand written notes
student nurse	NU1	observation of use	contextual inquiry	hand written notes
nurse manager	NU1	interview	semi-structured	notes in tablet
senior nurse	NU2	inquiry during interview	n.a.	recorded and transcribed
nurse manager	NU2	interview	semi-structured	recorded and transcribed
nurse manager	NU2	short inquiry during other research	n.a.	notes in tablet
nurse	NU2	short inquiry during other research	n.a.	notes in tablet
nurse manager	NU3	interview	semi-structured	notes in tablet
senior nurse	NU3	short inquiry / observation work	open-ended	hand written notes
nurse	NU3	use test and interview	open-ended	notes in tablet
student nurse	NU3	use test and interview	open-ended	notes in tablet
senior nurse	NU3	short inquiry based on use test	n.a.	notes in tablet
nurse	NU4	short interview during work time	semi-structured	notes in tablet
nurse	NU4	short interview during work time	semi-structured	notes in tablet
senior nurse	NU4	interview	semi-structured	hand written notes
nurse	NU4	short interview during work time	semi-structured	notes in tablet
nurse manager	NU4	interview	semi-structured	recorded and transcribed
senior nurse	NU5	short inquiry	n.a.	notes in tablet
senior nurse	NU6	interview	open-ended	notes in tablet
nurse manager	NU7	short inquiry during other research	n.a.	notes in tablet
nurse	NU8	short inquiry during other research	n.a.	hand written notes
other involved parties	other	interview	open-ended	notes in tablet
other involved parties	other	interview	open-ended	notes in tablet
other involved parties	other	interview by phone	open-ended	notes in tablet
